# Supplementary material for: Genome-wide identification and expression analysis of the GRAS gene family in Dendrobium chrysotoxum
Source: Front Plant Sci. 2022 Nov 28;13:1058287. doi: 10.3389/fpls.2022.1058287 (PMC9742484; doi:10.3389/fpls.2022.1058287)
Supplement: Supplementary Table 3 — Promoter and cis-acting elements analysis of DchGRAS genes; [file Table_3.xlsx]

## Sheet: Promoter analysis
Supplementary Table 2. Promoter analysis
	Right responsive																	Plant hormone								Plant growth				Stress responsive					Other
Name	3-AF1 binding site	ACE	AE-box	ATCT-motif	Box 4	chs-CMA1a	chs-CMA2a	GA-motif	GATA-motif	G-Box	GT1-motif	I-box	LAMP-element	MRE	Sp1	TCCC-motif	TCT-motif	ABRE	CGTCA-motif	GARE-motif	P-box	TATC-box	TCA-element	TGACG-motif	TGA-element	CAT-box	circadian	GCN4_motif	MSA-like	ARE	GC-motif	LTR	MBS	TC-rich repeats	A-box	AT-rich element	CCAAT-box	O2-site
DchGRAS1	0	0	0	0	1	0	0	1	0	2	0	0	0	1	1	0	0	1	2	1	0	0	0	2	0	0	0	0	1	5	0	0	1	0	1	0	0	0
DchGRAS2	0	0	0	0	3	0	0	1	0	1	1	0	0	0	0	1	2	0	2	0	0	0	2	2	0	0	1	0	0	2	0	0	0	0	0	1	0	2
DchGRAS3	0	0	0	0	2	0	0	0	0	2	0	0	0	0	0	1	2	1	0	0	1	0	1	0	0	0	0	0	0	2	0	0	1	0	0	0	0	1
DchGRAS4	0	0	0	0	4	0	0	0	0	3	4	1	0	0	0	0	0	3	4	1	0	0	0	4	0	1	0	0	0	1	0	2	0	0	1	0	0	0
DchGRAS5	1	0	1	0	1	0	0	0	1	2	2	0	0	0	0	0	1	1	1	0	0	1	1	1	0	0	0	2	0	1	0	3	0	0	0	0	1	2
DchGRAS6	1	0	0	0	0	0	0	0	0	3	1	0	0	0	1	1	0	2	0	1	0	0	0	0	0	2	0	0	1	5	0	0	0	0	1	0	1	1
DchGRAS7	0	0	0	0	1	0	0	0	0	1	2	0	0	2	0	1	5	0	3	0	1	0	0	3	0	0	1	1	0	2	0	0	0	0	0	0	0	1
DchGRAS8	0	0	0	0	11	0	0	0	2	3	1	0	0	1	1	0	0	1	0	0	2	0	0	0	0	0	1	0	0	1	1	0	1	0	0	0	0	0
DchGRAS9	0	0	0	0	0	2	1	1	2	1	0	0	0	0	0	1	2	2	5	0	2	0	1	5	0	1	0	0	0	0	0	1	1	0	1	0	0	0
DchGRAS10	0	0	0	0	3	0	1	0	0	2	0	0	0	0	0	1	0	1	4	1	0	0	0	4	1	0	0	0	2	5	0	0	2	0	1	0	1	1
DchGRAS11	0	0	0	1	7	0	0	0	1	2	2	0	0	2	0	1	3	2	4	0	0	0	1	4	0	0	0	0	0	0	0	0	0	0	0	0	0	0
DchGRAS12	0	0	0	0	0	0	2	1	0	1	4	0	0	0	1	0	0	1	8	0	1	0	3	8	0	2	1	0	0	0	1	1	1	0	0	0	1	1
DchGRAS13	0	1	0	0	3	0	0	0	2	0	0	0	0	1	1	0	0	0	1	0	0	1	0	1	0	2	0	0	0	2	1	4	1	1	1	1	0	1
DchGRAS14	0	0	0	0	4	0	0	0	0	0	1	1	0	1	0	0	2	0	1	0	0	0	1	1	0	0	1	1	0	0	1	1	0	0	0	0	1	0
DchGRAS15	0	0	1	0	2	0	0	0	0	3	0	0	0	0	2	0	0	3	1	0	1	0	0	1	0	0	0	0	0	0	0	0	1	0	0	0	0	0
DchGRAS16	1	0	0	0	3	0	0	1	2	3	1	0	1	0	1	1	0	3	2	0	1	0	0	2	0	1	0	0	0	3	1	0	0	0	3	1	0	2
DchGRAS17	0	0	1	0	2	0	0	0	1	3	0	0	0	0	0	0	0	1	5	0	0	0	0	5	0	1	0	0	0	2	0	0	1	0	1	0	0	0
DchGRAS18	0	0	0	0	8	0	0	0	0	0	0	0	0	1	1	0	0	0	0	0	0	0	1	0	0	0	0	0	0	0	0	0	1	0	0	0	0	0
DchGRAS19	0	1	0	0	4	1	0	0	2	2	1	2	0	0	0	0	1	2	1	0	0	0	3	1	0	2	0	0	0	1	0	1	0	0	2	0	0	2
DchGRAS20	0	0	0	0	2	0	0	1	0	2	0	0	0	0	0	0	2	2	0	0	1	1	0	0	0	1	1	0	0	2	0	0	1	0	0	1	0	1
DchGRAS21	0	0	0	0	7	0	0	0	0	0	2	0	1	1	0	0	0	0	2	0	0	0	0	2	1	0	0	0	0	5	0	1	1	0	0	0	0	0
DchGRAS22	0	0	0	1	7	0	0	0	1	2	2	0	0	2	0	1	3	2	4	0	0	0	1	4	0	0	0	0	0	0	0	0	0	0	0	0	0	0
DchGRAS23	0	0	1	0	3	1	0	0	1	0	0	0	0	1	0	1	2	0	1	0	2	0	0	1	0	0	0	0	0	2	0	0	2	1	0	0	0	0
DchGRAS24	0	0	0	0	10	0	0	0	0	1	0	2	0	0	0	0	0	1	0	0	0	0	3	0	0	1	0	0	0	2	0	0	0	0	0	0	0	2
DchGRAS25	0	0	1	1	1	0	0	0	2	0	2	0	0	2	0	0	2	1	0	0	0	0	0	0	0	0	1	0	0	1	0	0	1	1	0	0	0	1
DchGRAS26	0	0	0	0	3	1	0	0	0	0	0	0	0	0	0	1	0	0	2	0	0	0	0	2	1	0	0	0	0	2	0	0	1	0	0	1	0	0
DchGRAS27	0	0	0	0	1	0	1	0	0	2	3	0	0	1	0	0	0	2	1	0	2	1	1	1	0	1	0	0	0	1	0	0	1	0	0	0	0	1
DchGRAS28	1	1	0	0	2	1	0	1	1	1	2	0	1	0	0	0	1	1	0	1	0	0	1	0	0	3	0	1	1	5	0	1	0	1	0	0	0	0
DchGRAS29	0	0	0	0	2	0	0	0	1	2	1	0	0	0	0	2	1	3	2	0	0	0	0	2	0	0	0	0	1	1	0	0	1	0	0	0	0	0
DchGRAS30	1	0	1	1	1	1	0	1	2	0	0	1	0	0	2	0	0	0	0	0	2	0	2	0	0	0	0	0	0	2	0	1	0	0	1	0	0	1
DchGRAS31	0	0	0	1	4	0	1	0	1	6	1	0	0	0	0	0	0	4	8	0	0	1	0	8	0	3	0	1	1	3	0	0	1	0	0	0	0	0
DchGRAS32	0	0	1	0	6	0	0	0	3	3	0	3	0	2	0	0	0	2	3	0	0	0	0	3	0	1	0	0	0	4	0	0	0	0	0	0	0	0
DchGRAS33	0	0	0	0	0	0	1	0	1	1	0	0	0	1	1	0	1	1	4	0	0	0	0	4	0	1	0	2	0	2	0	1	0	0	0	0	0	0
DchGRAS34	0	0	2	0	2	0	1	0	0	3	1	1	0	2	1	0	0	3	3	2	1	0	0	3	0	0	0	0	0	2	0	0	0	0	1	0	0	2
DchGRAS35	0	0	0	0	4	0	0	0	1	1	2	0	1	0	0	0	1	1	0	0	0	1	0	0	0	0	0	0	0	1	0	0	1	0	0	0	0	0
DchGRAS36	0	1	0	0	2	0	0	0	0	1	0	1	1	0	0	1	1	1	0	0	0	0	1	0	0	0	0	0	0	3	0	0	2	1	0	1	0	0
DchGRAS37	0	1	0	0	0	2	1	0	1	3	0	0	0	0	1	0	0	3	2	0	1	0	2	2	0	0	1	0	0	2	0	1	0	0	0	0	2	0
DchGRAS38	0	0	0	0	2	0	0	1	0	0	0	2	1	1	1	1	3	1	2	0	0	1	0	2	0	0	0	0	0	1	0	0	1	0	0	0	1	0
DchGRAS39	0	0	0	0	2	1	0	0	0	2	0	0	0	0	0	0	0	1	3	0	0	0	1	3	1	2	0	0	0	2	0	0	0	0	0	0	1	0
DchGRAS40	0	0	0	0	0	0	0	1	2	3	2	0	0	0	0	0	2	3	1	0	0	1	1	1	0	1	0	0	0	1	0	0	0	3	1	0	0	2
DchGRAS41	0	0	0	0	2	0	0	1	0	1	3	1	0	2	0	0	1	1	3	1	1	0	1	3	0	0	0	0	0	2	0	0	1	0	0	3	0	1
DchGRAS42	0	1	1	1	4	1	0	0	0	1	0	0	0	0	0	0	0	0	0	0	0	1	1	0	1	0	0	0	0	1	0	0	1	0	0	0	0	0
DchGRAS43	0	0	0	0	4	0	0	0	1	2	0	0	0	0	0	0	0	2	6	0	0	0	0	6	0	1	0	1	0	0	0	1	2	0	0	1	0	0
DchGRAS44	1	0	0	1	5	0	0	0	2	0	0	2	0	0	0	1	0	0	0	0	0	1	0	0	0	0	0	0	0	0	0	0	0	0	0	0	0	1
DchGRAS45	0	0	0	0	1	0	0	0	0	0	1	0	0	2	0	1	5	0	3	0	1	0	0	3	0	1	1	1	0	2	0	0	0	1	0	0	0	2
DchGRAS46	0	0	0	0	1	0	0	0	1	2	1	0	0	0	0	2	1	2	3	0	0	0	0	3	1	0	0	0	2	1	1	0	1	0	1	0	2	0

## Sheet: cis-acting element statistics
Supplementary Table 2. Cis-acting element statistics
Name	Light responsive	Plant hormone	Plant growth	Stress responsive	Other
DchGRAS1	6	6	1	6	1
DchGRAS2	9	6	1	2	3
DchGRAS3	7	3	0	3	1
DchGRAS4	12	12	1	3	1
DchGRAS5	9	5	2	4	3
DchGRAS6	7	3	3	5	3
DchGRAS7	12	7	2	2	1
DchGRAS8	19	3	1	3	0
DchGRAS9	10	15	1	2	1
DchGRAS10	7	11	2	7	3
DchGRAS11	19	11	0	0	0
DchGRAS12	9	21	3	3	2
DchGRAS13	8	3	2	9	3
DchGRAS14	9	3	2	2	1
DchGRAS15	8	6	0	1	0
DchGRAS16	14	8	1	4	6
DchGRAS17	7	11	1	3	1
DchGRAS18	10	1	0	1	0
DchGRAS19	14	7	2	2	4
DchGRAS20	7	4	2	3	2
DchGRAS21	11	5	0	7	0
DchGRAS22	19	11	0	0	0
DchGRAS23	10	4	0	5	0
DchGRAS24	13	4	1	2	2
DchGRAS25	11	1	1	3	1
DchGRAS26	5	5	0	3	1
DchGRAS27	8	8	1	2	1
DchGRAS28	12	3	5	7	0
DchGRAS29	9	7	1	2	0
DchGRAS30	11	4	0	3	2
DchGRAS31	14	21	5	4	0
DchGRAS32	18	8	1	4	0
DchGRAS33	6	9	3	3	0
DchGRAS34	13	12	0	2	3
DchGRAS35	10	2	0	2	0
DchGRAS36	8	2	0	6	1
DchGRAS37	9	10	1	3	2
DchGRAS38	12	6	0	2	1
DchGRAS39	5	9	2	2	1
DchGRAS40	10	7	1	4	3
DchGRAS41	11	10	0	3	4
DchGRAS42	9	3	0	2	0
DchGRAS43	7	14	2	3	1
DchGRAS44	12	1	0	0	1
DchGRAS45	10	7	3	3	2
DchGRAS46	8	9	2	3	3
