# Supplementary material for: Genome-wide identification and expression analysis of the GRAS gene family in Dendrobium chrysotoxum
Source: Front Plant Sci. 2022 Nov 28;13:1058287. doi: 10.3389/fpls.2022.1058287 (PMC9742484; doi:10.3389/fpls.2022.1058287)
Supplement: Supplementary Table 5 — Primers and RT-qPCR analysis of 12 DchGRAS genes. [file Table_5.xlsx]

## Sheet: RT-qPCR primers
Supplementary Table 5. RT-qPCR primers
Gene name	Gene ID		Primers(5' to 3')
DchGRAS5	Maker107353	F	ACTCACACGCAGCCCTTCA
		R	CGGAGGTGGGTTCGTAGAGA
DchGRAS8	Maker106713	F	CCATCCACTACTACTCTGCTCTC
		R	TCCCTCCAATTCCCGAACTT
DchGRAS13	Maker93384	F	CTGTTGCTGCTGATGACCGT
		R	TCCGTTGCCGTAGTTCGTT
DchGRAS15	Maker74359	F	AATCCGCTCTCGGTTTCG
		R	TTCGTCCCAGATTTGGTTCC
DchGRAS21	Maker116208	F	AAAGTGGGGGTAGAAAGGCG
		R	AATCATCTCTATTGCTACTGAAATC
DchGRAS23	Maker57245	F	CGCCGTCAAGTAGAGAGAGAAT
		R	ATGTAGCCGAAGAAGCAACCT
DchGRAS25	Maker34817	F	CAGGAAAAGCATCATCTTACTCG
		R	CCCTTCACAATCACCTCCATAG
DchGRAS28	Maker98448	F	GCCCTCTCCAGACAACTCCA
		R	CTTGCTCAACAACGGTCATTATC
DchGRAS30	Maker78471	F	GCCGACGAGTTATCTTCTTCAG
		R	AGTTGAGGAGGAGATGGATGAG
DchGRAS32	Maker71994	F	GCTCCATTGTCAGGTGATAAGG
		R	AGGATTCGGTCTCGGTGATT
DchGRAS42	Maker84792	F	GCACAGGAAGGATTGGAGAG
		R	CTCGTCAACCATGCTCTTCAA
DchGRAS45	Maker22635	F	GACAACGAAGGATGCGGATG
		R	CCAAGCCAGTGAGAGGATACC
Internal reference	EF-1α	F	TCCTGGACACCGTGACTTTATT
		R	CCAAGAGTGAAGGCGAGCA

## Sheet: RT-qPCR analysis
Supplementary Table 5. RT-qPCR analysis of 12 DchGRAS genes
ID	EF-1α	Maker107353	Maker106713	Maker93384	Maker74359	Maker116208	Maker57245	Maker34817	Maker98448	Maker78471	Maker71994	Maker84792	Maker22635
Name	Internal reference	DchGRAS5	DchGRAS8	DchGRAS13	DchGRAS15	DchGRAS21	DchGRAS23	DchGRAS25	DchGRAS28	DchGRAS30	DchGRAS32	DchGRAS42	DchGRAS45
A	25.6288	24.5813	34.9329	28.935	27.3629	31.9075	33.7627	29.9137	37.0129	23.8402	23.8851	9.63109	29.3581
	25.2346	24.4132	34.4173	28.8519	27.5724	31.9477	34.2958	30.6126	37.5979	23.5915	23.5098	9.19355	29.5424
	25.5369	24.0312	34.4383	28.658	27.41	31.9712	33.9275	30.4155	36.976	23.0026	22.9961	9.56474	29.6758
Mean	25.4668	24.3419	34.5962	28.815	27.4484	31.9421	33.9953	30.3139	37.1956	23.4781	23.4637	9.46313	29.5254
ΔCT1		-1.12485	9.1294	3.34821	1.98168	6.47535	8.52856	4.84717	11.7288	-1.98865	-2.0031	-16.0036	4.05864
ΔCT2		-1.12485	9.1294	3.34821	1.98168	6.47535	8.52856	4.84717	11.7288	-1.98865	-2.0031	-16.0036	4.05864
2-ΔΔCT		1	1	1	1	1	1	1	1	1	1	1	1
Standard Deviation		0.281907	0.29183	0.142158	0.109876	0.0322219	0.272985	0.360388	0.348889	0.430156	0.446306	0.235808	0.159547
T	25.4613	23.8928	34.3065	24.0354	26.1075	31.8019	31.9534	29.0841	35.9007	22.5418	22.142	7.88198	28.7568
	25.1251	23.802	34.4083	23.931	25.8571	31.7507	30.8484	29.258	34.5479	22.4412	23.8297	7.61514	28.9746
	25.9459	23.5107	35.0735	24.4566	25.7416	31.7586	31.5257	29.444	34.6845	22.7816	22.569	8.46914	29.05
Mean	25.5108	23.7352	34.5961	24.141	25.9021	31.7704	31.4425	29.2621	35.0444	22.5882	22.8469	7.98875	28.9272
ΔCT1		-1.12485	9.1294	3.34821	1.98168	6.47535	8.52856	4.84717	11.7288	-1.98865	-2.0031	-16.0036	4.05864
ΔCT2		-1.7756	9.08536	-1.36974	0.391328	6.25963	5.93175	3.7513	9.5336	-2.92257	-2.66388	-17.522	3.41641
2-ΔΔCT		1.56998	1.03099	26.3175	3.01123	1.16129	6.04947	2.13742	4.57956	1.91045	1.58094	2.86466	1.56074
Standard Deviation		0.199648	0.416566	0.27829	0.187069	0.0275782	0.557159	0.180006	0.744744	0.174881	0.877496	0.436899	0.152243
B	25.4222	31.5126	34.8235	26.9833	29.3871	32.6532	37.0014	31.9056	35.8754	27.946	25.424	9.92999	28.1874
	25.2383	31.7431	34.7662	26.605	28.8715	31.9536	36.8364	31.8863	35.1525	28.414	24.7944	9.94006	28.494
	25.5365	32.7427	35.4966	26.2601	29.4005	32.3592	37.0547	32.1655	35.5847	28.9186	24.6202	10.2365	28.9376
Mean	25.399	31.9995	35.0288	26.6162	29.2197	32.322	36.9642	31.9858	35.5375	28.4262	24.9462	10.0355	28.5397
ΔCT1		6.60049	9.62979	1.21717	3.82072	6.92301	11.5652	6.5868	10.1386	3.02722	-0.452782	-15.3635	3.1407
ΔCT2		6.60049	9.62979	1.21717	3.82072	6.92301	11.5652	6.5868	10.1386	3.02722	-0.452782	-15.3635	3.1407
2-ΔΔCT		1	1	1	1	1	1	1	1	1	1	1	1
Standard Deviation		0.653889	0.406155	0.361707	0.301628	0.351296	0.113798	0.155914	0.363729	0.486426	0.422859	0.174145	0.377215
ST	25.7555	30.8552	33.813	25.705	25.9762	30.9161	33.9304	30.8709	34.806	26.8927	24.3717	9.6143	26.4821
	25.5938	30.9022	32.9524	25.7256	25.7874	30.9483	34.2845	30.6283	34.3171	26.9717	24.2318	9.42772	26.9793
	25.6485	30.9967	33.1035	24.8758	25.6618	30.9018	33.0786	31.2227	35.0158	25.9915	23.916	9.0474	27.3575
Mean	25.6659	30.918	33.2896	25.4355	25.8085	30.9221	33.7645	30.9073	34.713	26.6186	24.1731	9.36314	26.9396
ΔCT1		6.60049	9.62979	1.21717	3.82072	6.92301	11.5652	6.5868	10.1386	3.02722	-0.452782	-15.3635	3.1407
ΔCT2		5.2521	7.62368	-0.230488	0.142519	5.25611	8.09858	5.24133	9.04702	0.952698	-1.49279	-16.3028	1.27371
2-ΔΔCT		2.54628	4.01696	2.72766	12.8011	3.1753	11.0548	2.54113	2.13101	4.21205	2.05624	1.91766	3.6477
Standard Deviation		0.0720562	0.459491	0.484823	0.158295	0.023845	0.619831	0.298857	0.35852	0.544531	0.233472	0.288917	0.439091
C	25.1655	31.0111	37.021	26.3437	27.0865	34.0812	36.4567	30.3205	35.2473	26.1271	27.0323	9.51479	26.3647
	25.3165	31.3275	36.9243	26.1459	27.0509	34.2028	36.9155	30.3558	35.8757	25.8714	27.8574	9.35257	26.2409
	25.4517	30.8122	37.2857	27.4588	27.5091	34.5625	36.2899	30.268	36.4876	26.436	27.4866	8.83858	26.738
Mean	25.3112	31.0503	37.077	26.6495	27.2155	34.2822	36.554	30.3148	35.8702	26.1448	27.4588	9.23532	26.4479
ΔCT1		5.73907	11.7658	1.33824	1.90428	8.97093	11.2428	5.00353	10.559	0.833593	2.14757	-16.0759	1.13668
ΔCT2		5.73907	11.7658	1.33824	1.90428	8.97093	11.2428	5.00353	10.559	0.833593	2.14757	-16.0759	1.13668
2-ΔΔCT		1	1	1	1	1	1	1	1	1	1	1	1
Standard Deviation		0.259852	0.187077	0.707818	0.254896	0.250314	0.323981	0.0442131	0.620132	0.282714	0.413259	0.353024	0.258784
10	25.9875	30.8443	35.9854	25.8903	23.55	33.431	34.1219	28.4168	33.2758	25.3843	25.7453	9.02916	26.5755
	25.7843	30.8243	36.0952	25.3193	23.4582	33.076	34.3575	28.3942	33.157	25.7135	25.6308	8.70291	26.8751
	25.6847	30.3186	36.2658	25.809	23.7846	33.1409	33.8426	29.1222	32.7895	24.7512	24.8073	8.04724	26.8826
Mean	25.8188	30.6624	36.1155	25.6728	23.5976	33.216	34.1073	28.6444	33.0741	25.283	25.3945	8.5931	26.7777
ΔCT1		5.73907	11.7658	1.33824	1.90428	8.97093	11.2428	5.00353	10.559	0.833593	2.14757	-16.0759	1.13668
ΔCT2		4.84359	10.2967	-0.145966	-2.22123	7.39717	8.28853	2.8256	7.25528	-0.535791	-0.424341	-17.2257	0.958936
2-ΔΔCT		1.86022	2.76854	2.79763	17.4543	2.97681	7.75033	4.52505	9.87437	2.5836	5.94598	2.21884	1.13112
Standard Deviation		0.29787	0.141289	0.308867	0.168313	0.189002	0.257798	0.413926	0.253504	0.489078	0.511719	0.500083	0.175181
