# Supplementary material for: Genome-wide identification and expression analysis of the GRAS gene family in Dendrobium chrysotoxum
Source: Frontiers journal article supplement (doi:10.3389/fpls.2022.1058287), 2022-11-28
Supplement: Table_4.PDF [file Table_4.PDF]

**Supplementary Figure 4.** Plant images of *D. chrysotoxum* before and after different abiotic stresses

|                                                                                                                                                              | Before                                                                               | After                                                                                 |
|--------------------------------------------------------------------------------------------------------------------------------------------------------------|--------------------------------------------------------------------------------------|---------------------------------------------------------------------------------------|
| <p><b>Group-A</b></p> <p>High temperature stress</p> <p>(16h light/8h dark, 30°C/38°C, water once every 24h, treatment 48h.)</p>                             |    |    |
| <p><b>Group-B</b></p> <p>Salt stress</p> <p>(16h light/8h dark, 15°C/25°C, irrigated with 0.5 M NaCl solution and plant roots every 8h, treatment 48h..)</p> |   |   |
| <p><b>Group-C</b></p> <p>Drought stress</p> <p>(16h light/8h dark, 15°C/25°C, treatment ten days)</p>                                                        |  |  |
